# Supplementary material for: Laser induced ultrafast combustion synthesis of solution-based AlOx for thin film transistors
Source: Royal Society of Chemistry journal article supplement (doi:10.1039/d0tc01204a), 2020-01-01
Supplement: d0tc01204a1.pdf [file d0tc01204a1.pdf]

## Laser induced ultrafast combustion synthesis of solution-based AlO<sub>x</sub> for thin film transistors

*Emanuel Carlos<sup>1,2</sup>, Spilios Dellis<sup>2</sup>, Nikolaos Kalfagiannis<sup>2</sup>, Loukas Koutsokeras<sup>3</sup>, Demosthenes C. Koutsogeorgis<sup>2\*</sup>, Rita Branquinho<sup>1\*</sup>, Rodrigo Martins<sup>1</sup> and Elvira Fortunato<sup>1\*</sup>*

<sup>1</sup>CENIMAT/i3N Departamento de Ciência dos Materiais, Faculdade de Ciências e Tecnologia (FCT), Universidade NOVA de Lisboa (UNL), and CEMOP/UNINOVA, 2829-516 Caparica, Portugal.

<sup>2</sup>School of Science and Technology, Nottingham Trent University, Nottingham, NG11 8NS, UK.

<sup>3</sup>Cyprus University of Technology, Research Unit for Nanostructured Materials Systems, Kitiou Kyprianou 36, 3041, Lemesos, Cyprus

\*E-mail: demosthenes.koutsogeorgis@ntu.ac.uk, ritasba@fct.unl.pt and emf@fct.unl.pt;

The Supplementary Information contains the full data sets related to the production of AlO<sub>x</sub> dielectric thin films from solution, by excimer laser annealing (ELA) treatment inducing combustion synthesis, and their application in thin film transistors (TFTs). Table S1 and S2 shows the statistical parameters of dielectric properties obtained from MIS devices. Figure S1 and S2 depicts FTIR spectra for all ELA conditions and for both drying durations, 15 min and 1 min, respectively. Figure S3, S4 and S5-S6 show the capacitance–voltage, capacitance–frequency and breakdown voltage (E) characteristics of Al/p-type Si/(AlO<sub>x</sub>)/Al MIS capacitors for both drying durations. Tables S3 and S4 depicts the electrical characteristics summary obtained from IGZO TFTs comprising the sol-gel AlO<sub>x</sub> fabricated by all the different ELA treatments, while Figures S7 and S8 show the transfer curves of the same IGZO TFTs devices. Finally, Figure S9 depicts the typical output curves of two test TFT devices and the reference. Table S5 shows the statistical TFT parameters from a previous report using deep ultraviolet (DUV) curing for 30 min<sup>1</sup>, alongside those of the optimum devices produced in this work (using 15 min drying cycle followed by ELA). Table S6 depicts relevant low temperature solution-based AlO<sub>x</sub> layers processed by different curing methods applied in TFTs reported previously in the literature.

**Table S1.** Statistical parameters of dielectric properties obtained for the MIS devices dried for 15 min and then treated by ELA. These are all graphically depicted in Figure 3 (a) in the main paper. The reference device (300 °C for 1h) is also shown for comparison.

| <b>Fluence</b><br>(mJ/cm <sup>2</sup> ) | <b>Number of pulses</b> | <b>Capacitance</b><br>( $\mu$ F/cm <sup>2</sup> ) | <b>Thickness</b><br>(nm) | <b>E</b><br>(MV/cm) | <b>Dielectric constant</b> |
|-----------------------------------------|-------------------------|---------------------------------------------------|--------------------------|---------------------|----------------------------|
| 125                                     | 1                       | 0.08 $\pm$ 0.01                                   | 27.9 $\pm$ 0.4           | 1.94 $\pm$ 0.01     | 2.62 $\pm$ 0.01            |
|                                         | 2                       | 0.12 $\pm$ 0.02                                   | 28.3 $\pm$ 0.5           | 1.82 $\pm$ 0.02     | 3.8 $\pm$ 0.8              |
|                                         | 3                       | 0.20 $\pm$ 0.01                                   | 27.7 $\pm$ 0.4           | 1.93 $\pm$ 0.05     | 6.2 $\pm$ 0.1              |
| 150                                     | 1                       | 0.10 $\pm$ 0.01                                   | 28.7 $\pm$ 0.3           | 1.78 $\pm$ 0.01     | 3.1 $\pm$ 0.4              |
|                                         | 2                       | 0.35 $\pm$ 0.02                                   | 16.5 $\pm$ 0.3           | 3.10 $\pm$ 0.02     | 6.5 $\pm$ 0.4              |
|                                         | 3                       | 0.38 $\pm$ 0.01                                   | 18.2 $\pm$ 0.4           | 3.3 $\pm$ 0.3       | 7.9 $\pm$ 0.1              |
| 175                                     | 1                       | 0.38 $\pm$ 0.02                                   | 22.1 $\pm$ 0.9           | 2.4 $\pm$ 0.2       | 9.1 $\pm$ 0.1              |
|                                         | 2                       | 0.50 $\pm$ 0.06                                   | 15.2 $\pm$ 0.4           | 4.0 $\pm$ 0.5       | 8.6 $\pm$ 0.1              |
|                                         | 3                       | 0.53 $\pm$ 0.05                                   | 13.2 $\pm$ 0.3           | 3.1 $\pm$ 0.1       | 8.6 $\pm$ 0.7              |
| 200                                     | 1                       | 0.51 $\pm$ 0.04                                   | 15.2 $\pm$ 0.9           | 2.72 $\pm$ 0.09     | 8.8 $\pm$ 0.7              |
|                                         | 2                       | 0.54 $\pm$ 0.01                                   | 12.7 $\pm$ 0.6           | 3.5 $\pm$ 0.2       | 7.8 $\pm$ 0.2              |
|                                         | 3                       | 0.55 $\pm$ 0.01                                   | 12.8 $\pm$ 0.6           | 3.61 $\pm$ 0.06     | 7.9 $\pm$ 0.1              |
| Reference<br>(300 °C, 1h)               | 0                       | 0.42 $\pm$ 0.02                                   | 10.9 $\pm$ 0.1           | 3.82 $\pm$ 0.03     | 5.2 $\pm$ 0.2              |

**Table S2.** Statistical parameters of dielectric properties obtained for the MIS devices dried for 1 min and then treated by ELA. These are all graphically depicted in Figure 3 (b) in the main paper. The reference device (300 °C for 1h) is also shown for comparison.

| Fluence (mJ/cm <sup>2</sup> ) | Number of pulses | Capacitance (μF/cm <sup>2</sup> ) | Thickness (nm) | E (MV/cm)   | Dielectric constant |
|-------------------------------|------------------|-----------------------------------|----------------|-------------|---------------------|
| 200                           | 1                | 0.69 ± 0.04                       | 47.1 ± 0.9     | 1.15 ± 0.02 | 37 ± 2              |
|                               | 2                | 0.74 ± 0.05                       | 42.3 ± 0.8     | 0.89 ± 0.03 | 35 ± 3              |
|                               | 3                | 0.73 ± 0.04                       | 18.6 ± 1.8     | 3.0 ± 0.2   | 15.3 ± 0.9          |
| 225                           | 1                | 0.81 ± 0.04                       | 36.8 ± 0.4     | 1.5 ± 0.1   | 33 ± 1              |
|                               | 2                | 0.72 ± 0.05                       | 14.4 ± 0.7     | 2.9 ± 0.1   | 11.7 ± 0.8          |
|                               | 3                | 0.70 ± 0.04                       | 12.7 ± 0.5     | 3.5 ± 0.2   | 9.4 ± 0.1           |
| 250                           | 1                | 0.84 ± 0.03                       | 13.4 ± 0.5     | 3.1 ± 0.4   | 12.7 ± 0.5          |
|                               | 2                | 0.83 ± 0.05                       | 11.4 ± 0.3     | 3.6 ± 0.3   | 10.6 ± 0.6          |
|                               | 3                | 0.84 ± 0.01                       | 11.1 ± 0.4     | 3.9 ± 0.7   | 10.2 ± 0.5          |
| 300                           | 1                | 0.79 ± 0.05                       | 14.9 ± 0.7     | 2.9 ± 0.2   | 13.2 ± 0.8          |
|                               | 2                | 0.84 ± 0.02                       | 10.9 ± 0.5     | 3.5 ± 0.1   | 10.3 ± 0.2          |
|                               | 3                | 0.93 ± 0.01                       | 11.0 ± 0.5     | 3.4 ± 0.3   | 11 ± 1              |
| Reference (300 °C, 1h)        | 0                | 0.42 ± 0.02                       | 10.9 ± 0.1     | 3.82 ± 0.03 | 5.2 ± 0.2           |

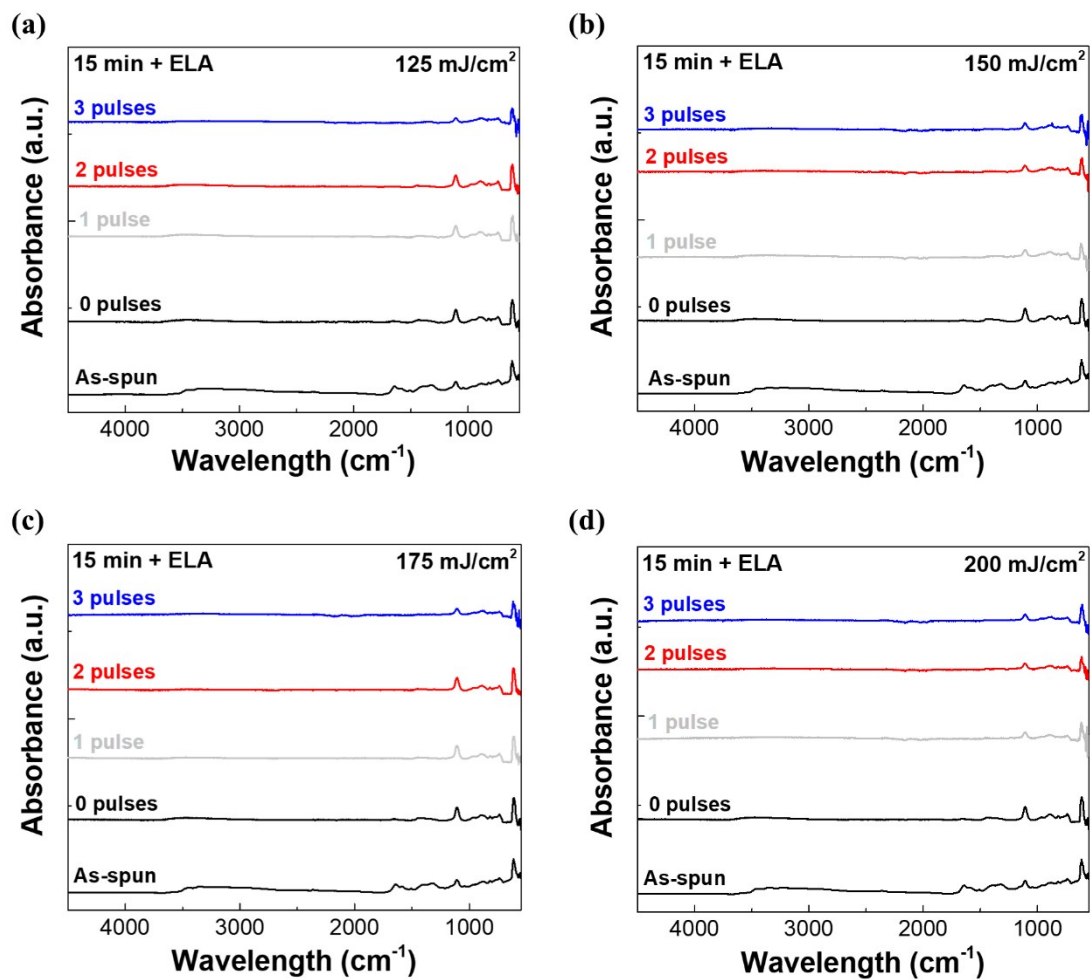

**Figure S1.** FTIR spectra of  $\text{AlO}_x$  thin films with 15 min of drying and ELA treatment using different fluences and pulses: (a)  $125 \text{ mJ/cm}^2$ ; (b)  $150 \text{ mJ/cm}^2$ ; (c)  $175 \text{ mJ/cm}^2$ ; (d)  $200 \text{ mJ/cm}^2$ .

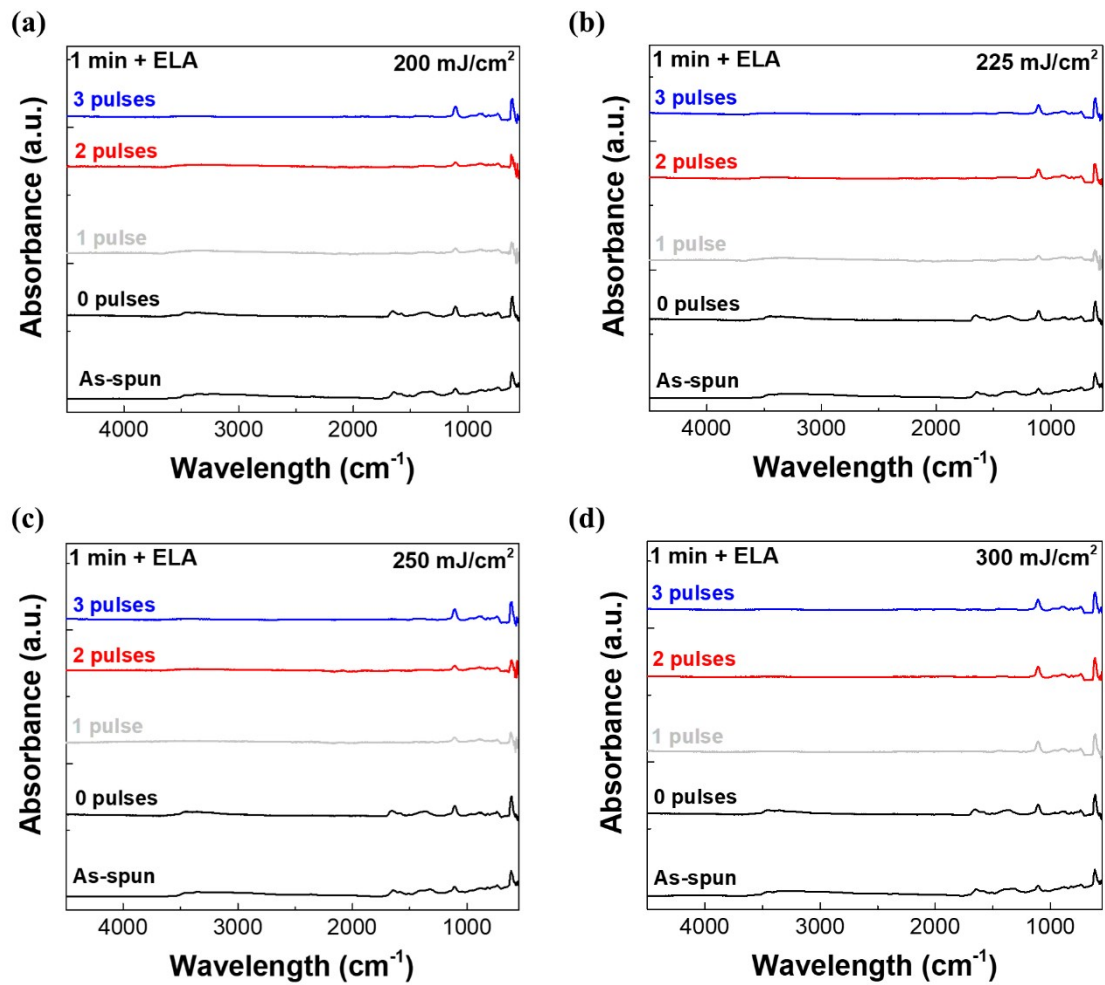

**Figure S2.** FTIR spectra of  $\text{AlO}_x$  thin films with 1 min of drying and ELA treatment using different fluences and pulses: (a)  $200 \text{ mJ/cm}^2$ ; (b)  $225 \text{ mJ/cm}^2$ ; (c)  $250 \text{ mJ/cm}^2$ ; (d)  $300 \text{ mJ/cm}^2$ .

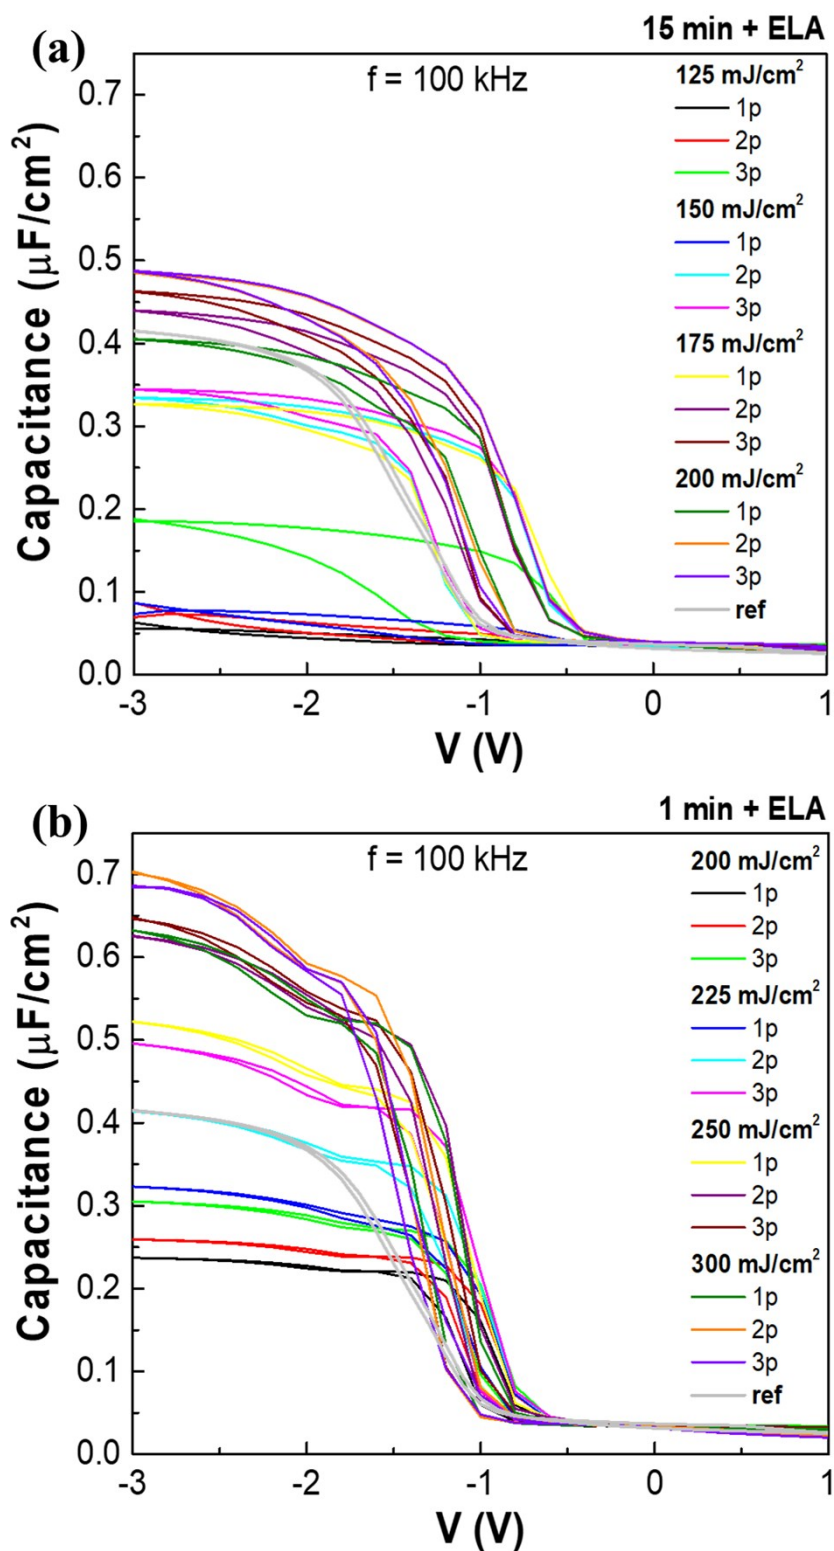

**Figure S3.** Typical capacitance–voltage characteristics at 100 kHz of solution-based  $\text{AlO}_x$  MIS capacitors dried at 150 °C for (a) 15 min and (b) 1 min followed by ELA treatment for different fluences and pulses. The reference device (300 °C for 1h) is also shown for comparison.

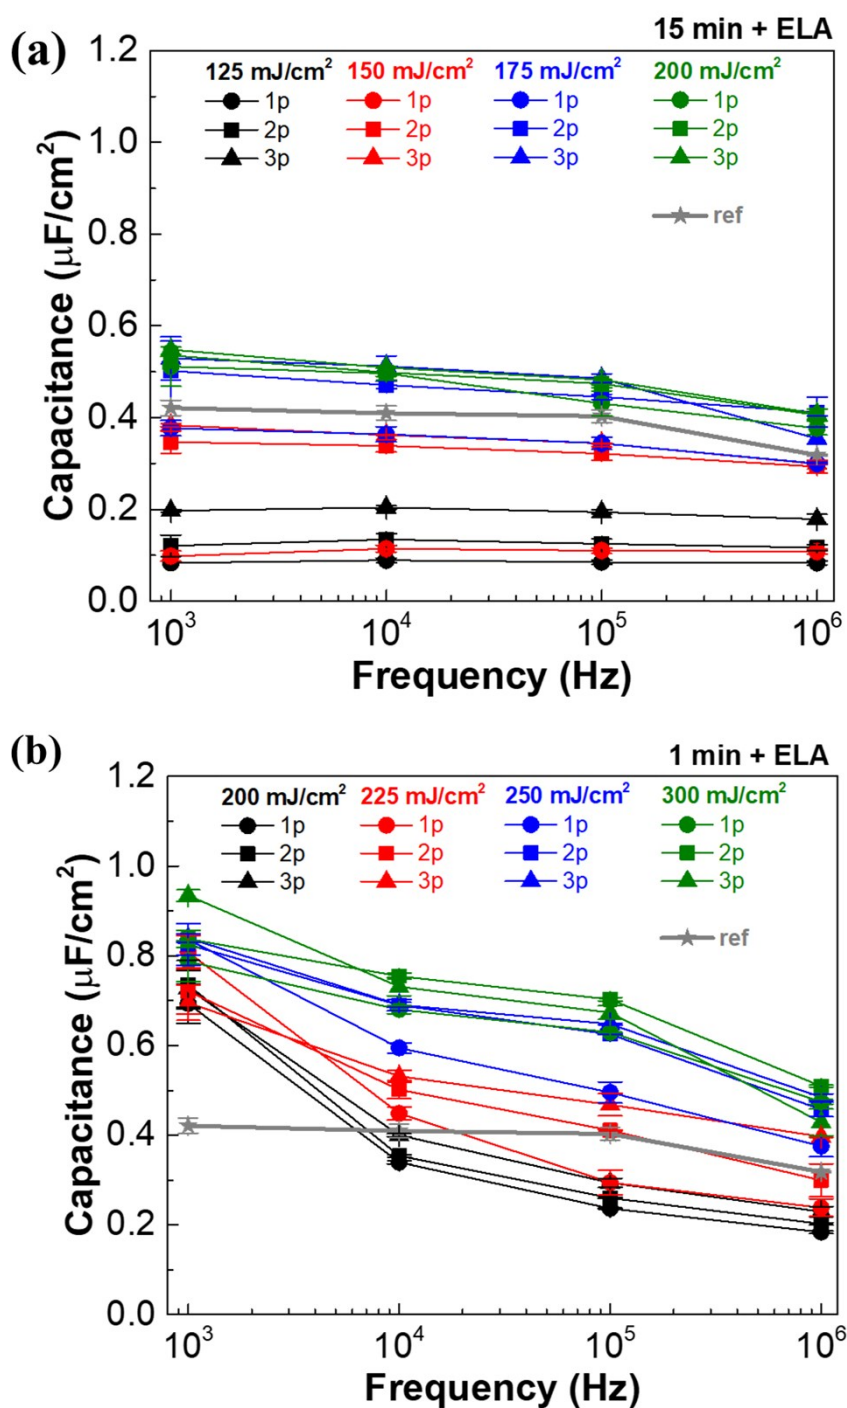

**Figure S4.** Typical capacitance–frequency characteristics of solution-based  $\text{AlO}_x$  MIS capacitors dried at  $150^\circ\text{C}$  for (a) 15 min and (b) 1 min followed by ELA treatment for different fluences and pulses. The reference device ( $300^\circ\text{C}$  for 1h) is also shown for comparison.

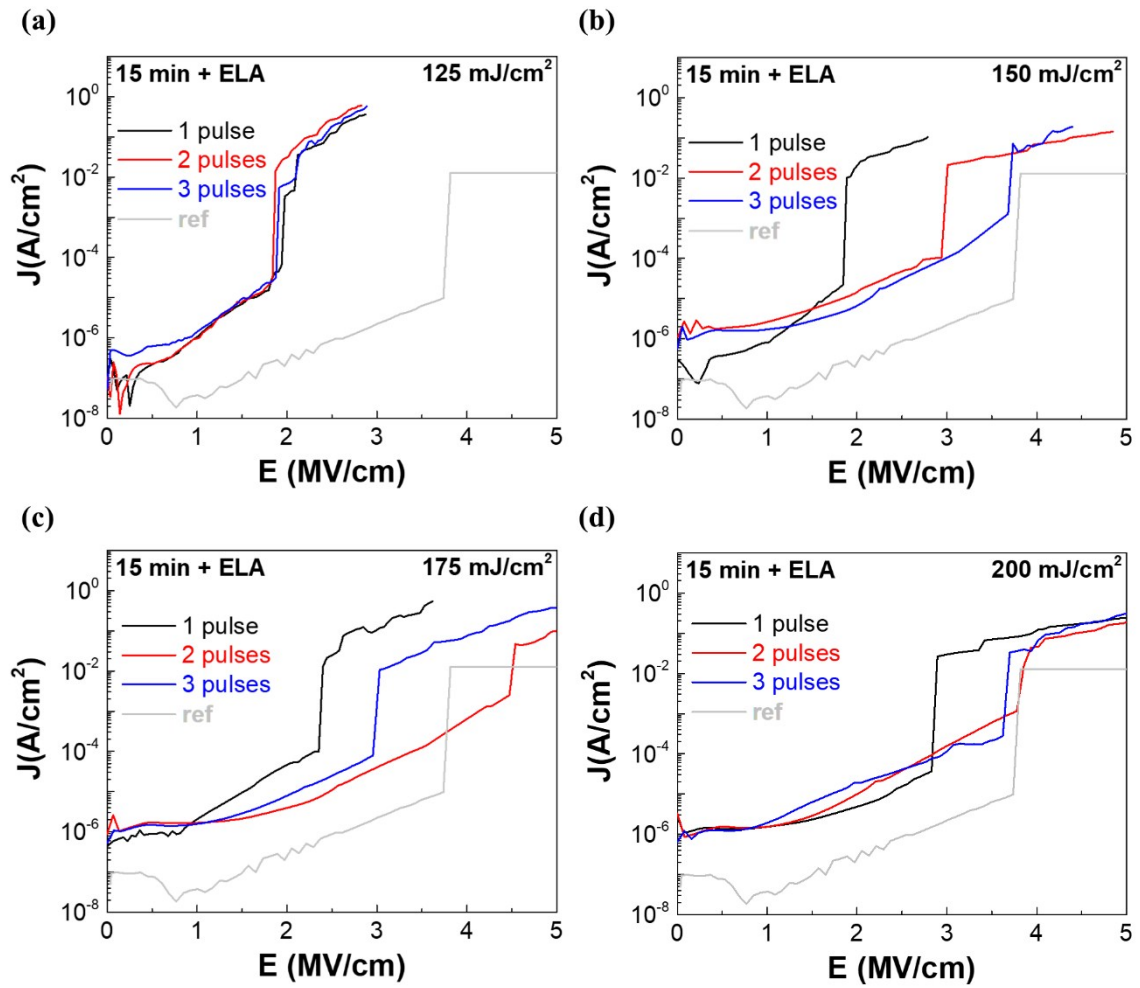

**Figure S5.** Typical current density ( $J$ ) and breakdown field ( $E$ ) characteristics of solution-based  $\text{AlO}_x$  MIS capacitors with 15 min of drying and ELA treatment using different fluences and pulses: (a)  $125 \text{ mJ/cm}^2$ ; (b)  $150 \text{ mJ/cm}^2$ ; (c)  $175 \text{ mJ/cm}^2$ ; (d)  $200 \text{ mJ/cm}^2$ . The reference device ( $300 \text{ }^\circ\text{C}$  for 1h) is also shown for comparison.



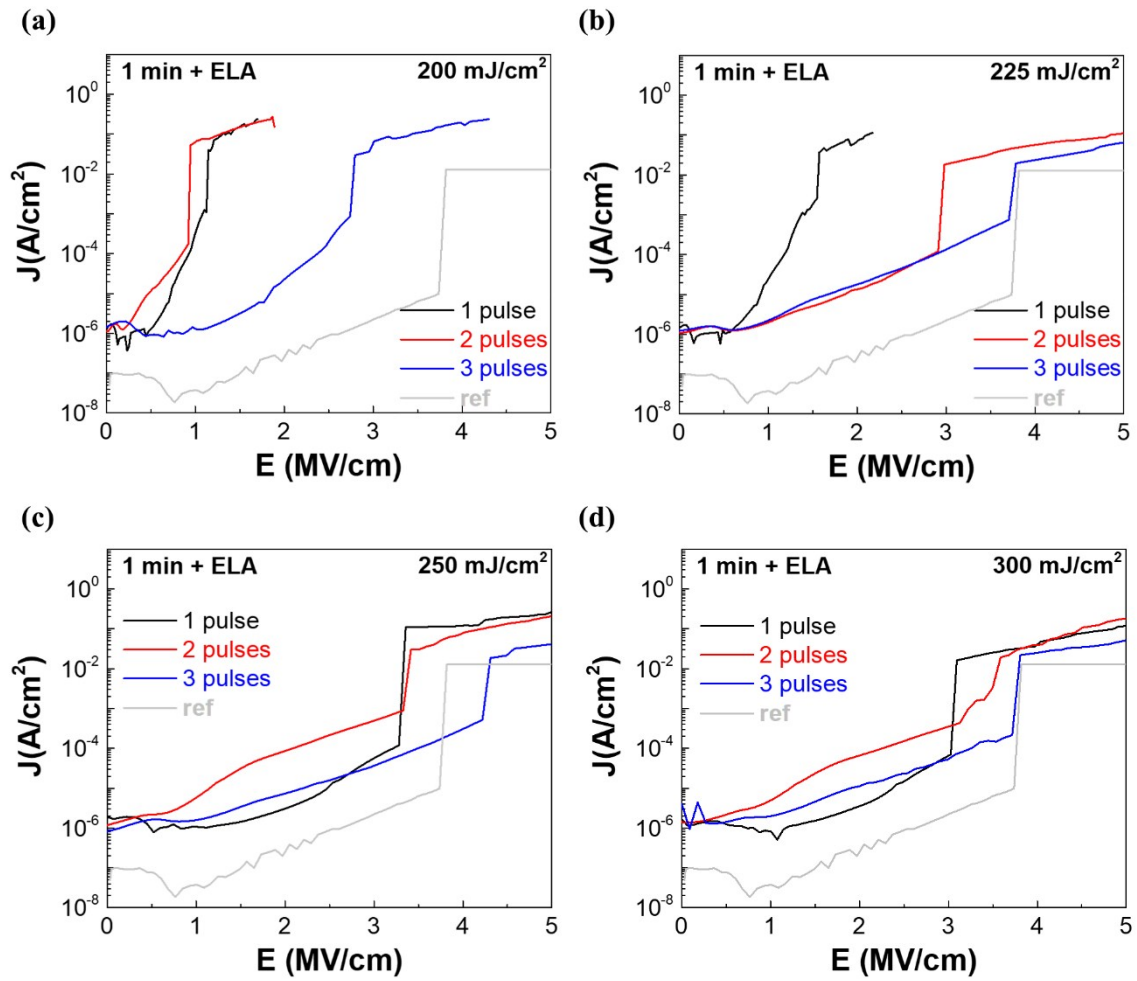

**Figure S6.** Typical current density ( $J$ ) and breakdown field ( $E$ ) characteristics of solution-based  $\text{AlO}_x$  MIS capacitors with 1 min of drying and ELA treatment using different fluences and pulses: (a)  $200 \text{ mJ/cm}^2$ ; (b)  $225 \text{ mJ/cm}^2$ ; (c)  $250 \text{ mJ/cm}^2$ ; (d)  $300 \text{ mJ/cm}^2$ . The reference device ( $300 \text{ }^\circ\text{C}$  for 1h) is also shown for comparison.

**Table S3.** Parameters of TFTs obtained for the devices with 15 min of drying followed by ELA. These are all graphically depicted in Figure 4 (a) in the main paper. The reference device (300 °C for 1h) is also shown for comparison.

| Fluence<br>(mJ/cm <sup>2</sup> ) | Number of<br>pulses | $\mu_{SAT}$<br>(cm <sup>2</sup> /V·s) | SS<br>(V/dec) | $I_{ON/OFF}$      | $V_{ON}$<br>(V) | $V_{Hyst}$<br>(V) |
|----------------------------------|---------------------|---------------------------------------|---------------|-------------------|-----------------|-------------------|
| 150                              | 2                   | 11.7                                  | 0.13          | $1.5 \times 10^4$ | -0.27           | 0.05              |
|                                  | 3                   | 17.9                                  | 0.14          | $2.1 \times 10^4$ | -0.22           | 0.07              |
| 175                              | 1                   | 18.6                                  | 0.13          | $1.0 \times 10^4$ | 0.05            | 0.08              |
|                                  | 2                   | 20.0                                  | 0.10          | $1.6 \times 10^4$ | - 0.07          | 0.07              |
|                                  | 3                   | 12.8                                  | 0.15          | $9.7 \times 10^3$ | - 0.22          | 0.04              |
| 200                              | 1                   | 8.0                                   | 0.19          | $3.1 \times 10^3$ | - 0.36          | 0.05              |
|                                  | 2                   | 14.5                                  | 0.21          | $3.2 \times 10^3$ | - 0.36          | 0.04              |
|                                  | 3                   | 8.71                                  | 0.23          | $1.4 \times 10^3$ | - 0.22          | 0.01              |
| Reference<br>(300 °C, 1h)        | 0                   | 13.7                                  | 0.13          | $1.1 \times 10^4$ | - 0.07          | 0.06              |

**Table S4.** Parameters of TFTs obtained for the devices with 1 min of drying followed by ELA. These are all graphically depicted in Figure 4 (b) in the main paper. The reference device (300 °C for 1h) is also shown for comparison.

| Fluence<br>(mJ/cm <sup>2</sup> ) | Number of<br>pulses | $\mu_{SAT}$<br>(cm <sup>2</sup> /V·s) | SS<br>(V/dec) | $I_{ON/OFF}$      | $V_{ON}$<br>(V) | $V_{Hyst}$<br>(V) |
|----------------------------------|---------------------|---------------------------------------|---------------|-------------------|-----------------|-------------------|
| 225                              | 2                   | 18.4                                  | 0.18          | $1.2 \times 10^4$ | - 0.36          | 0.06              |
|                                  | 3                   | 22.4                                  | 0.12          | $6.5 \times 10^4$ | - 0.41          | 0.09              |
| 250                              | 1                   | 5.8                                   | 0.12          | $1.0 \times 10^4$ | - 0.14          | 0.04              |
|                                  | 2                   | 14.8                                  | 0.13          | $1.7 \times 10^4$ | - 0.20          | 0.04              |
|                                  | 3                   | 7.6                                   | 0.19          | $7.2 \times 10^3$ | - 0.04          | 0.01              |
| 300                              | 1                   | 15.5                                  | 0.12          | $2.8 \times 10^4$ | - 0.30          | 0.06              |
|                                  | 2                   | 14.7                                  | 0.12          | $1.7 \times 10^4$ | - 0.20          | 0.02              |
|                                  | 3                   | 9.7                                   | 0.18          | $1.0 \times 10^4$ | - 0.50          | 0                 |
| Reference<br>(300 °C, 1h)        | 0                   | 13.7                                  | 0.13          | $1.1 \times 10^4$ | - 0.07          | 0.06              |

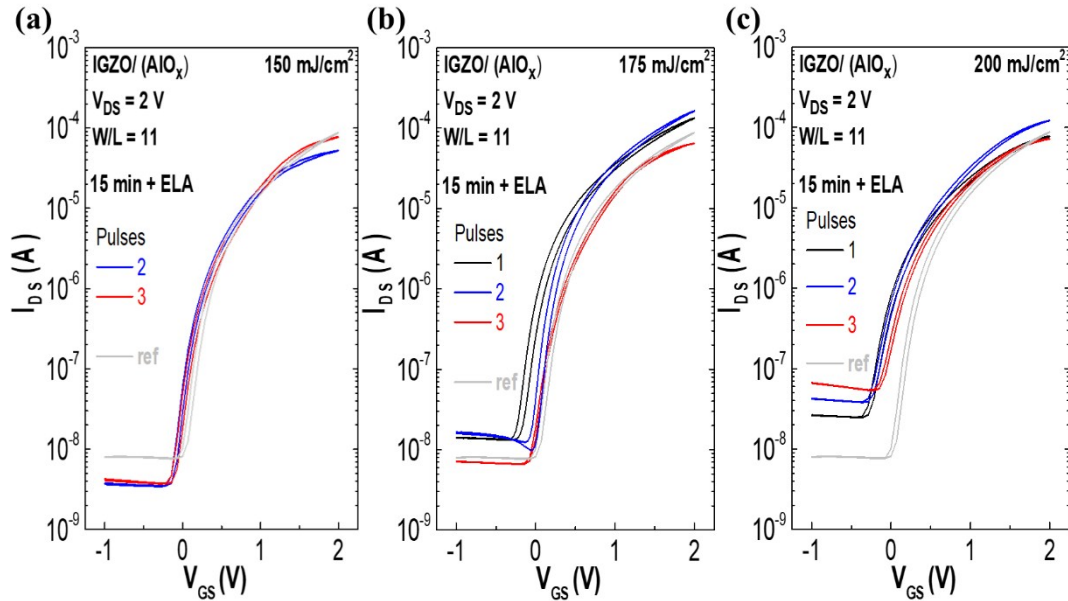

**Figure S7.** Transfer curves of IGZO TFTs with 15 min of drying followed by ELA treatment using different fluences and pulses: (a) 150  $\text{mJ}/\text{cm}^2$ ; (b) 175  $\text{mJ}/\text{cm}^2$ ; (c) 200  $\text{mJ}/\text{cm}^2$ . The reference device (300 °C for 1h) is also shown for comparison.

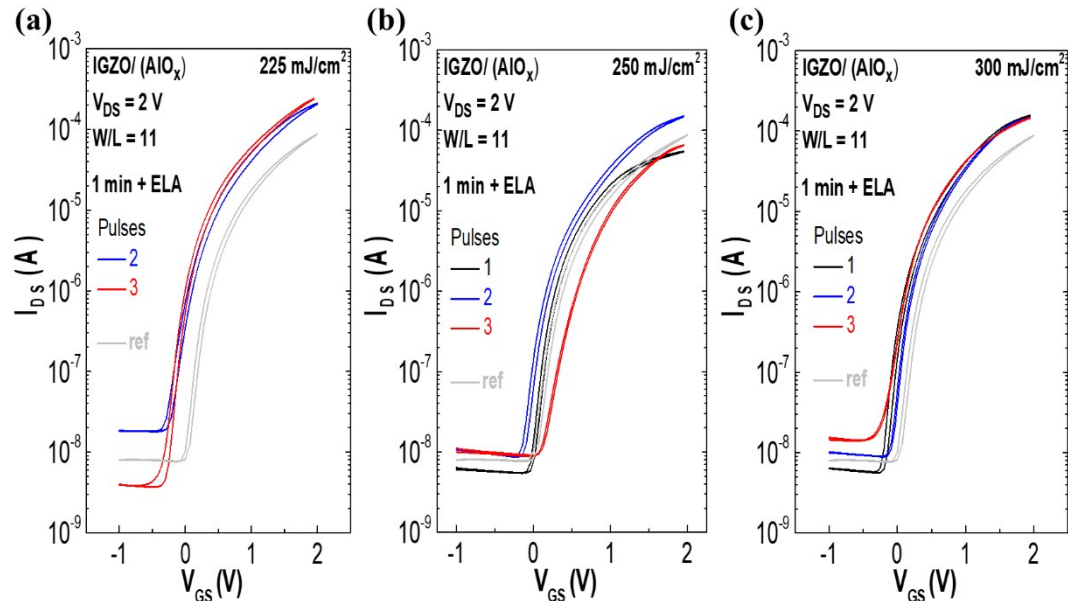

**Figure S8.** Transfer curves of IGZO TFTs with 1 min of drying followed by ELA treatment using different fluences and pulses: (a) 225  $\text{mJ}/\text{cm}^2$ ; (b) 250  $\text{mJ}/\text{cm}^2$ ; (c) 300  $\text{mJ}/\text{cm}^2$ . The reference device (300 °C for 1h) is also shown for comparison.

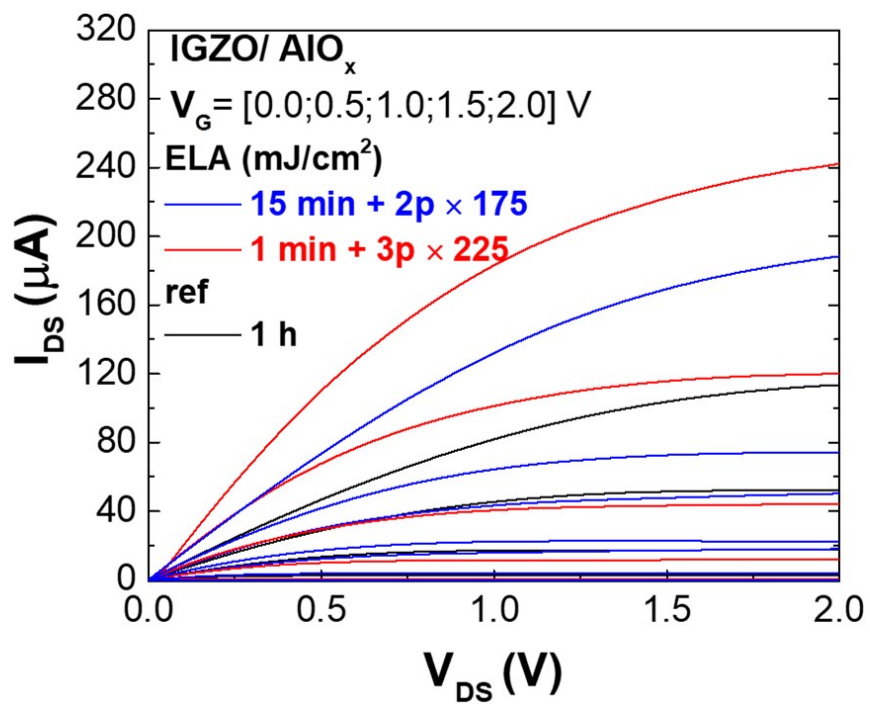

**Figure S9.** Typical output curves of IGZO/ $AlO_x$  TFTs.

**Table S5.** Statistics of TFT parameters in a previous report<sup>1</sup> using deep ultraviolet (DUV) for 30 min and this work using the 15 min drying followed by ELA. These are all graphically depicted in Figure 5 (b) in the main paper.

| Condition             | $V_{ON}$<br>(V)    | $\mu_{SAT}$<br>( $\text{cm}^2/\text{V}\cdot\text{s}$ ) | SS<br>(V/dec)     |
|-----------------------|--------------------|--------------------------------------------------------|-------------------|
| 150 °C + DUV (30 min) | $-0.02 \pm 0.06$   | $17.3 \pm 0.9$                                         | $0.09 \pm 0.01$   |
| 150 °C + ELA (15 min) | $-0.015 \pm 0.027$ | $20.4 \pm 0.9$                                         | $0.103 \pm 0.001$ |

**Table S6.** Literature of relevant low temperature ( $\leq 150$  °C) solution-based  $\text{AlO}_x$  layers processed by different curing methods applied in TFTs.

| Year                 | Irradiation source<br>(wavelength) | Irradiation time (pre-annealing time) | T<br>(°C) | $\mu_{SAT}$<br>( $\text{cm}^2 \text{V}^{-1} \text{s}^{-1}$ ) | Selectivity |
|----------------------|------------------------------------|---------------------------------------|-----------|--------------------------------------------------------------|-------------|
| 2015 <sup>2</sup>    | Deep-ultraviolet lamp<br>(254 nm)  | 30 min (-)                            | 150       | 8.33                                                         | No          |
| 2016 <sup>3</sup>    | Far ultraviolet lamp<br>(160 nm)   | 30 min (-)                            | 150       | 14.10                                                        | No          |
| 2017 <sup>1</sup>    | Deep-ultraviolet lamp<br>(254 nm)  | 30 min (-)                            | 150       | 17.3                                                         | No          |
| 2017 <sup>4</sup>    | Deep-ultraviolet lamp<br>(254 nm)  | 120 min (-)                           | 60        | 5.9                                                          | No          |
| 2019 <sup>5</sup>    | Deep-ultraviolet lamp<br>(254 nm)  | 120 min (-)                           | 150       | ~ 6                                                          | No          |
| <b>Present study</b> | Excimer laser<br>(248 nm)          | 2 s (15 min)                          | 150       | 20.0                                                         | Yes         |
|                      |                                    | 3 s (1 min)                           |           | 22.4                                                         | Yes         |

## References

- 1 E. Carlos, R. Branquinho, A. Kiazadeh, J. Martins, P. Barquinha, R. Martins and E. Fortunato, *ACS Appl. Mater. Interfaces*, 2017, **9**, 40428–40437.
- 2 S. K. Park, K.-H. K. T. K. H. K.-T. Kim, J.-W. W. Jo, S. Sung, K.-H. K. T. K. H. K.-T. Kim, W.-J. J. Lee, J. Kim, H. J. Kim, G.-R. R. Yi, Y.-H. H. Kim, M.-H. H. Yoon and S. K. Park, *Adv. Funct. Mater.*, 2015, **25**, 2807–2815.
- 3 E. Carlos, R. Branquinho, A. Kiazadeh, P. Barquinha, R. Martins and E. Fortunato, *ACS Appl. Mater. Interfaces*, 2016, **8**, 31100–31108.
- 4 J.-W. Jo, Y.-H. Kim, J. Park, J. S. Heo, S. Hwang, W.-J. Lee, M.-H. Yoon, M.-G. Kim and S. K. Park, *ACS Appl. Mater. Interfaces*, 2017, **9**, 35114–35124.
- 5 B.-S. Yu, J.-Y. Jeon, B.-C. Kang, W. Lee, Y.-H. Kim and T.-J. Ha, *Sci. Rep.*, 2019, **9**, 8416.
